# Supplementary material for: Toxicity assessment and mechanistic investigation of engineered monoclinic VO2nanoparticles
Source: Royal Society of Chemistry journal article supplement (doi:10.1039/c8nr02224k), 2018-01-01
Supplement: c8nr02224k1.pdf [file c8nr02224k1.pdf]

Supporting Information

**Toxic assessment and mechanistic investigation of engineered monoclinic VO<sub>2</sub> nanoparticles**

Di Wu,<sup>a†</sup> Qianqian Su,<sup>a,c†</sup> Yang Li,<sup>a</sup> Zhang Chen,<sup>b</sup> Xian Qin,<sup>c</sup> Yuan-Yuan Liu,<sup>a</sup> Wen-Song Xi,<sup>a</sup> Yanfeng Gao,<sup>\*b</sup> Aoneng Cao,<sup>a</sup> Xiaogang Liu,<sup>c,d</sup> Haifang Wang<sup>\*a</sup>

<sup>a</sup> Institute of Nanochemistry and Nanobiology, Shanghai University, Shanghai 200444, China

<sup>b</sup> School of Materials Science and Engineering, Shanghai University, Shanghai, 200444, China

<sup>c</sup> Department of Chemistry, National University of Singapore, Singapore 117543, Singapore.

<sup>d</sup> Institute of Materials Research and Engineering, Singapore 117602, Singapore.

\*Corresponding authors: H. Wang, Email: [hwang@shu.edu.cn](mailto:hwang@shu.edu.cn); Y. Gao, Email: [yfgao@shu.edu.cn](mailto:yfgao@shu.edu.cn)

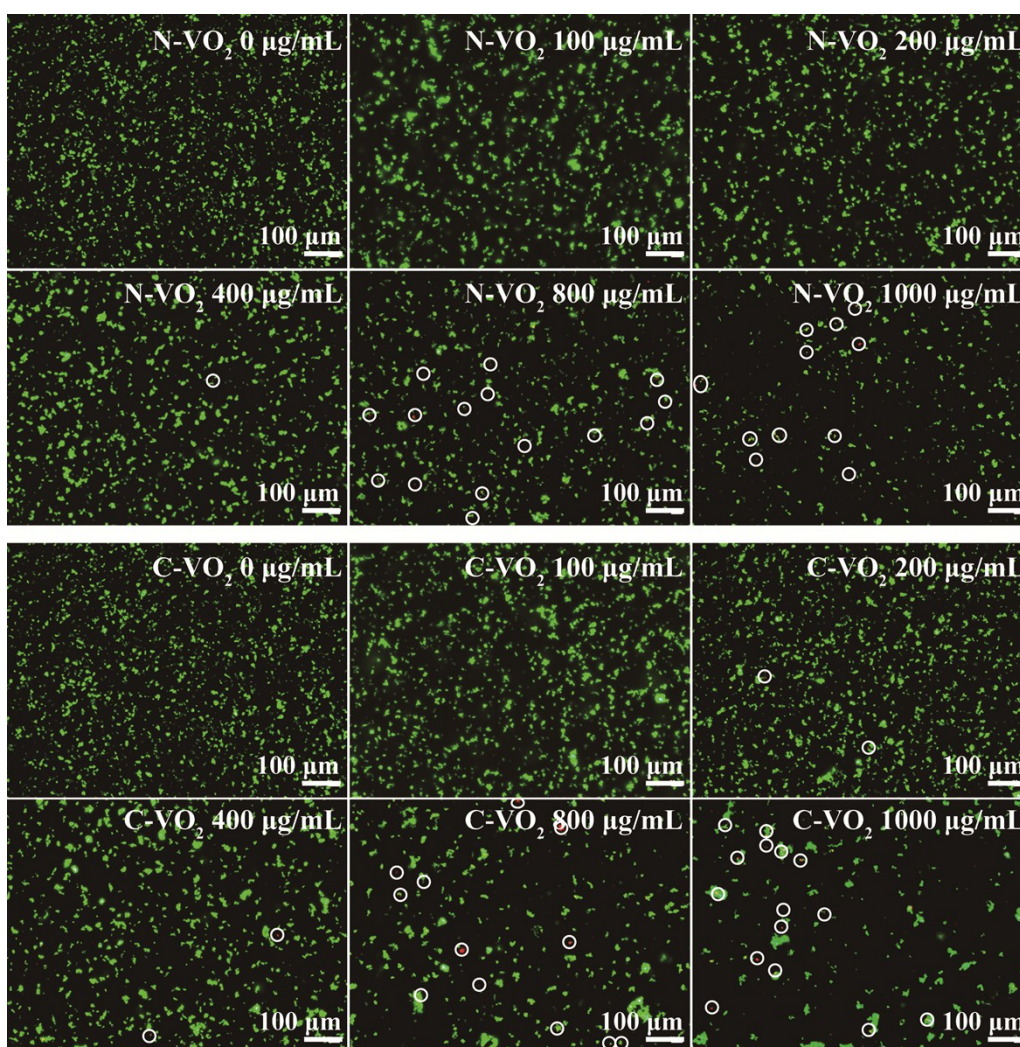

**Figure S1.** Photos of live or dead *S. aureus* that had been treated with N-VO<sub>2</sub> and C-VO<sub>2</sub> for 12 h. Bacteria were stained with SYTO9 and PI. Green color represents live cells with intact membrane, whereas red color represents the disrupted cells, which are marked with white circles.

**Table S1.** Physicochemical properties of VO<sub>2</sub> particles (10 µg/mL).

|                                 | Water                    |                    | LB media                 |                    |
|---------------------------------|--------------------------|--------------------|--------------------------|--------------------|
|                                 | Zeta potential (mV, DLS) | Diameter (nm, NTA) | Zeta potential (mV, DLS) | Diameter (nm, NTA) |
| N-VO <sub>2</sub>               | -27.0                    | 94 ± 33            | -7.48                    | 217 ± 148          |
| C-VO <sub>2</sub>               | -22.1                    | 132 ± 54           | -7.66                    | 187 ± 104          |
| M-VO <sub>2</sub>               | -37.8                    | /                  | -6.63                    | /                  |
| C-VO <sub>2</sub><br>(grinding) | -28.3                    | 141 ± 65           | -8.33                    | 197 ± 79           |

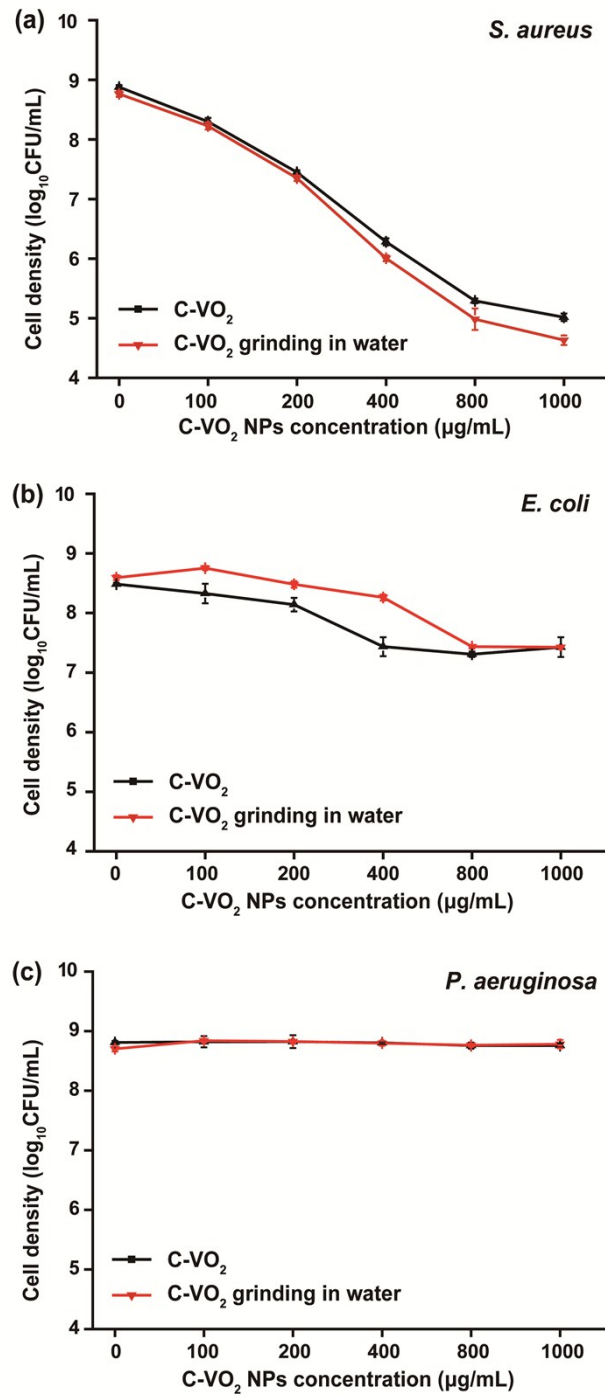

**Figure S2.** Antibacterial effects of VO<sub>2</sub> particles against *S. aureus* (a), *E. coli* (b), and *P. aeruginosa* (c). All experiments were performed in triplicate.

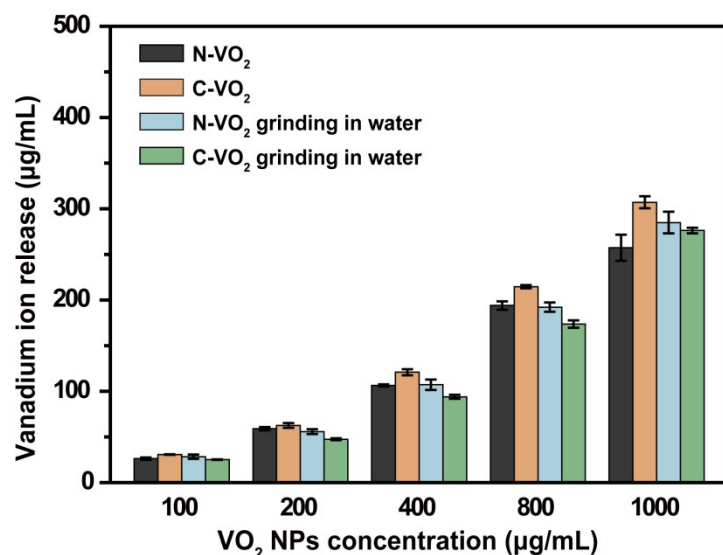

**Figure S3.** Dissolution of VO<sub>2</sub> prepared by grinding in water with different methods in LB media for 12 h incubation. All experiments were performed in triplicate.

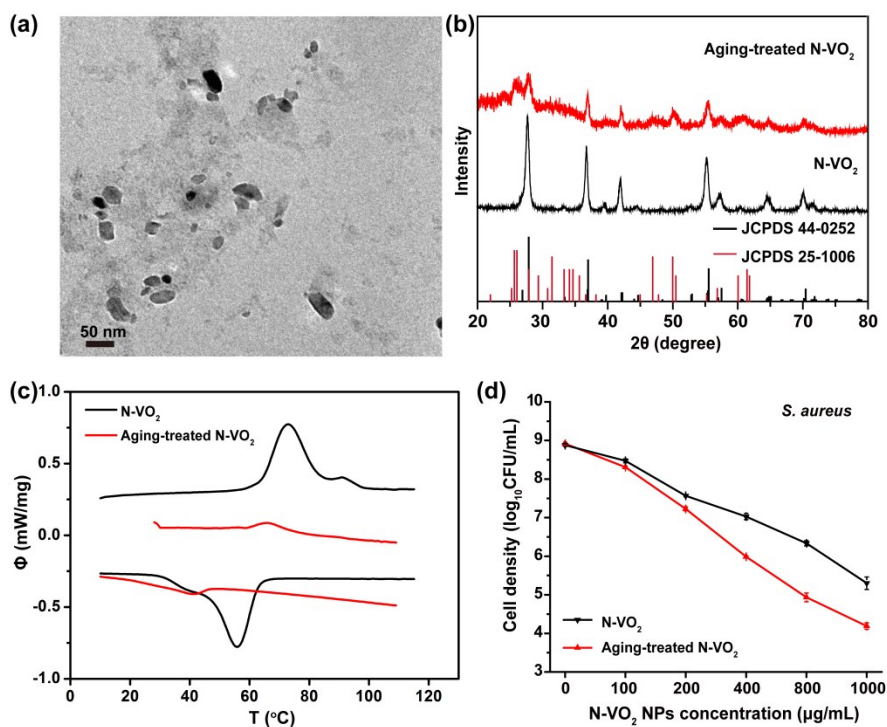

**Figure S4.** Characterization of aging-treated VO<sub>2</sub> nanoparticles. (a) TEM image of aging-treated N-VO<sub>2</sub> particles. (b) XRD patterns of N-VO<sub>2</sub> particles before and after aging treatment. (c) DSC thermal spectra of N-VO<sub>2</sub> particles before and after aging treatment. (d) Antibacterial activity of N-VO<sub>2</sub> particles against *S. aureus*. This experiment was performed in triplicate.

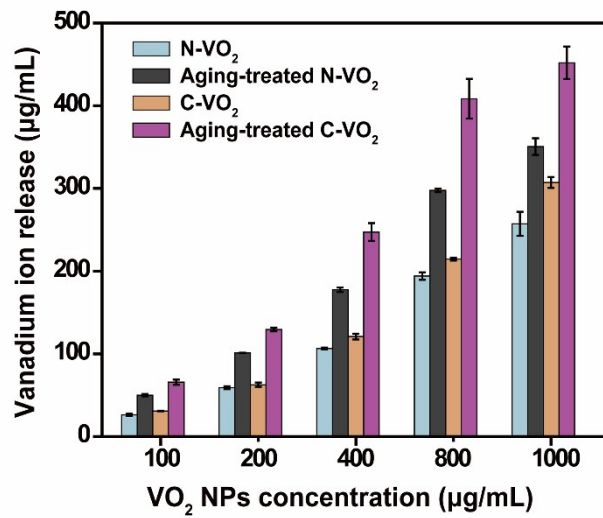

**Figure S5.** The effect of aging treatment on the dissolution of VO<sub>2</sub> in LB media after 12 h. All experiments were performed in triplicate.

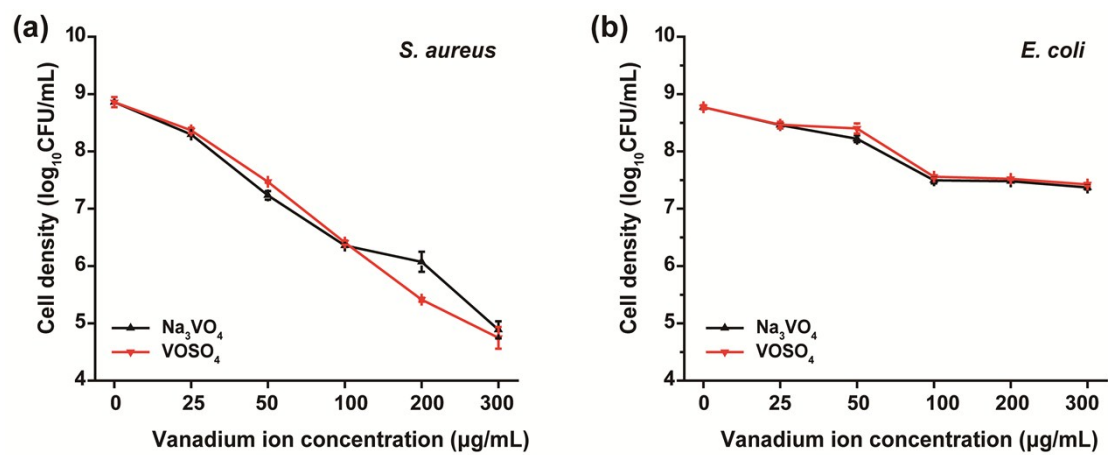

**Figure S6.** Antibacterial activity of two vanadium ions against *E. coli* (a) and *S. aureus* (b). All experiments were performed in triplicate.

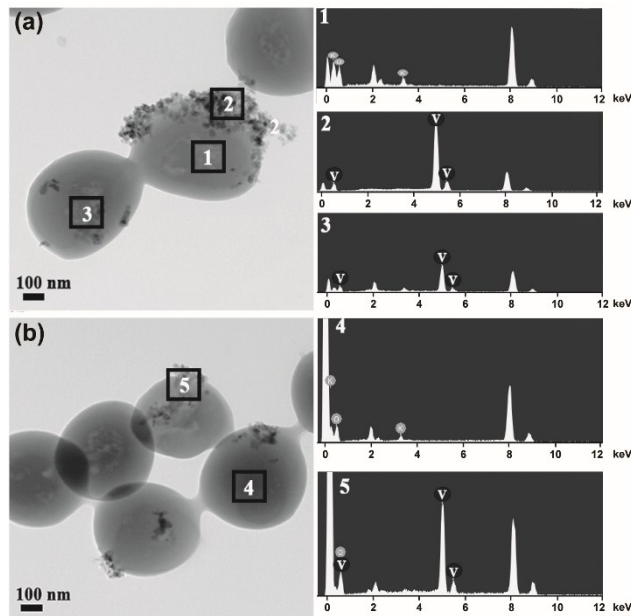

**Figure S7.** HRTEM-EDS analysis of *S. aureus* after treated with N-VO<sub>2</sub> NPs (a) and C-VO<sub>2</sub> NPs (b).

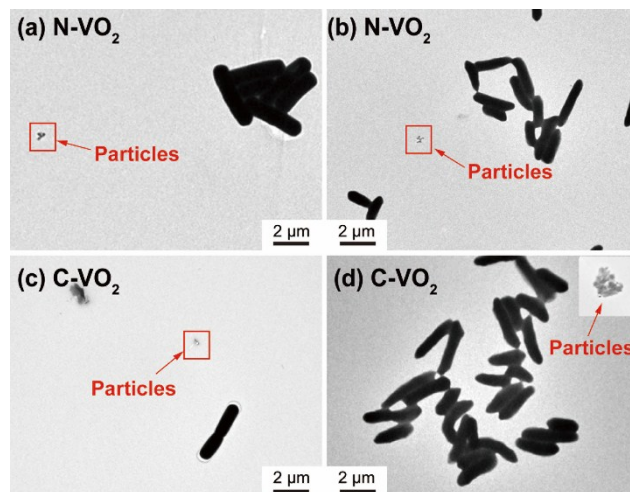

**Figure S8.** TEM images of *B. subtilis* (a, c) and *P. aeruginosa* (b, d) after treatment with N-VO<sub>2</sub> (a, b) and C-VO<sub>2</sub> (c, d) at the concentration of 400 µg/mL.
